# Supplementary material
Source: publisher figshare collection journal article supplement (https://frontiersin.figshare.com/ndownloader/files/23599016)
Supplement: Supplementary file [file 23599016]

**Supplemental Table 1. ICC analysis of intra- and interobserver variations.**

| Variables              | Intraobserver variation |             | P value | Interobserver variation |             | P value |
|------------------------|-------------------------|-------------|---------|-------------------------|-------------|---------|
|                        | ICC                     | 95%CI       |         | ICC                     | 95%CI       |         |
| RVEDA, cm <sup>2</sup> | 0.986                   | 0.965-0.994 | <0.001  | 0.993                   | 0.982-0.997 | <0.001  |
| RVESA, cm <sup>2</sup> | 0.978                   | 0.944-0.991 | <0.001  | 0.972                   | 0.928-0.989 | <0.001  |
| Tricuspid E, cm/s      | 0.989                   | 0.972-0.996 | <0.001  | 0.967                   | 0.918-0.987 | <0.001  |
| Tricuspid A, cm/s      | 0.961                   | 0.903-0.984 | <0.001  | 0.954                   | 0.885-0.982 | <0.001  |
| Tricuspid s', cm/s     | 0.972                   | 0.931-0.989 | <0.001  | 0.944                   | 0.858-0.978 | <0.001  |
| Tricuspid e', cm/s     | 0.910                   | 0.778-0.964 | <0.001  | 0.878                   | 0.691-0.952 | <0.001  |
| Tricuspid IVV, cm/s    | 0.902                   | 0.756-0.961 | <0.001  | 0.925                   | 0.811-0.970 | <0.001  |
| Tricuspid IVAT, ms     | 0.853                   | 0.635-0.941 | <0.001  | 0.901                   | 0.749-0.961 | <0.001  |
| RVGLS, %               | 0.923                   | 0.800-0.971 | <0.001  | 0.819                   | 0.516-0.932 | <0.001  |
| 2DS basal, %           | 0.916                   | 0.734-0.974 | <0.001  | 0.818                   | 0.496-0.934 | 0.001   |
| 2DS mid, %             | 0.826                   | 0.514-0.938 | 0.001   | 0.838                   | 0.518-0.946 | 0.001   |
| 2DS Apical, %          | 0.849                   | 0.604-0.943 | <0.001  | 0.827                   | 0.461-0.944 | 0.002   |
| Mean T2P, ms           | 0.889                   | 0.708-0.958 | <0.001  | 0.880                   | 0.668-0.956 | <0.001  |
| PAAT, ms               | 0.873                   | 0.685-0.949 | <0.001  | 0.987                   | 0.967-0.995 | <0.001  |
| PAET, ms               | 0.967                   | 0.918-0.987 | <0.001  | 0.974                   | 0.935-0.990 | <0.001  |
| PEP, ms                | 0.949                   | 0.847-0.980 | <0.001  | 0.917                   | 0.791-0.967 | <0.001  |
| PAV, cm/s              | 0.980                   | 0.950-0.992 | <0.001  | 0.992                   | 0.979-0.997 | <0.001  |
| TRV, cm/s              | 0.969                   | 0.924-0.988 | <0.001  | 0.971                   | 0.927-0.989 | <0.001  |

Abbreviations as in Table 2 and 3.
